# Supplementary material
Source: PubMed Central journal article supplement (PMC4324374)

**Figure S1. Tumorspheres cultures.**

(a) Representative phase contrast and fluorescent micrograph of tumorspheres showing high transduction efficiency of lentiviral infection with a GFP marker. (b) Primary tumors and tumorspheres were stained for Keratin-8 (1:250, University of Iowa Developmental Studies Hybridoma Bank) and Keratin-14 (1:500, Covance). Human Par3b (hPar3b) is resistant to the mouse-specific Par3 shRNA (McCaffrey and Macara, 2009). Insets at the right show a magnified image of tumorspheres (lower) and sections from NICD/shLuc and NICD/shPar3 tumors. Scale bars = 100 $\mu$ m (a) and 25 $\mu$ m (b).

**Figure S2. Rac activity and knockdown of Tiam1 in mammary epithelial cells.**

(a) Levels of active Rac1-GTP were measured in GFP and NICD spheres using a GLISA assay kit (Cytoskeleton Inc.), n=4. (b) Immunoblot of cell lysates from primary MECs expressing shLuc (control) or Tiam1 shRNAs (shRNA sequences: shTiam1-1 5'-ggaacagattctcaagcta; shTiam1-2 5'-cgagttccttaagactcta; shTiam1-3 5'-cgatgactttatattata; shTiam1-4 5'-tttcgtgetatgatgaatc) for Tiam1 (1:500, Santa Cruz). E-cadherin (1:2000, BD Biosciences) was used as a loading control.

**Figure S3. JNK activity controls tumorsphere growth downstream of Tiam1 and Rac.**

**(a)** Tumorsphere cultures of MECs expressing GFP (control) or Tiam1 grown in the presence or absence of 25 $\mu$ M JNK inhibitor (SP600125). **(b)** Quantification of tumorsphere sizes in (a), n=3. **(c)** Tumorsphere cultures of MECs expressing GFP (control) or constitutively active Rac1<sup>G12V</sup> grown in the presence or absence of 25 $\mu$ M JNK inhibitor (SP600125). **(d)** Quantification of tumorsphere sizes in (c), n=3. **(e)** Immunoblot of cell lysates from primary MECs expressing NICD/shLuc or NICD/shPar3 for phospho-ERK1/2 (1:1000, Cell Signaling Technology). Tubulin was used as a loading control. Scale bars = 1mm.

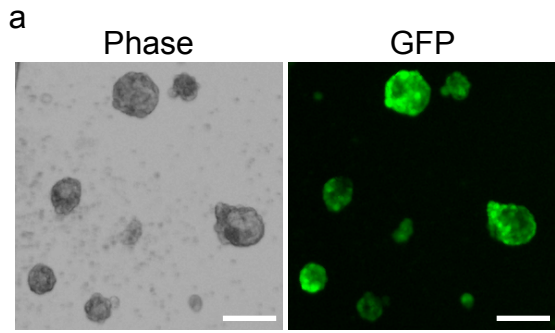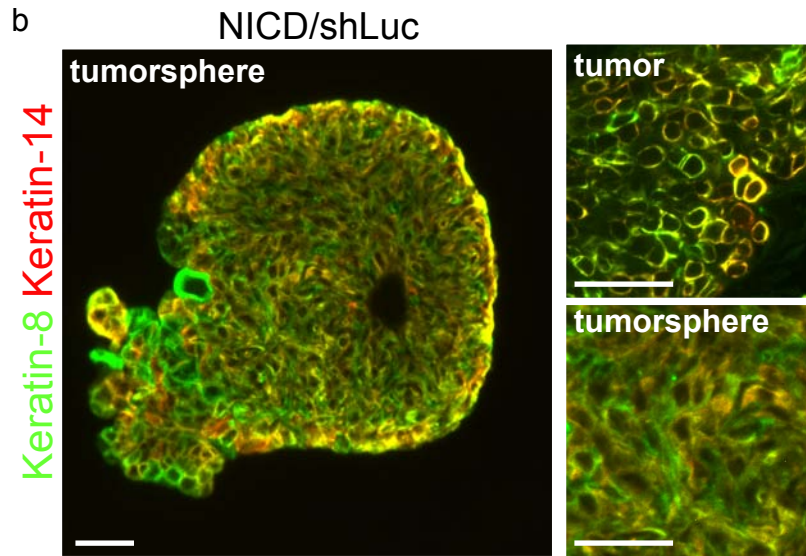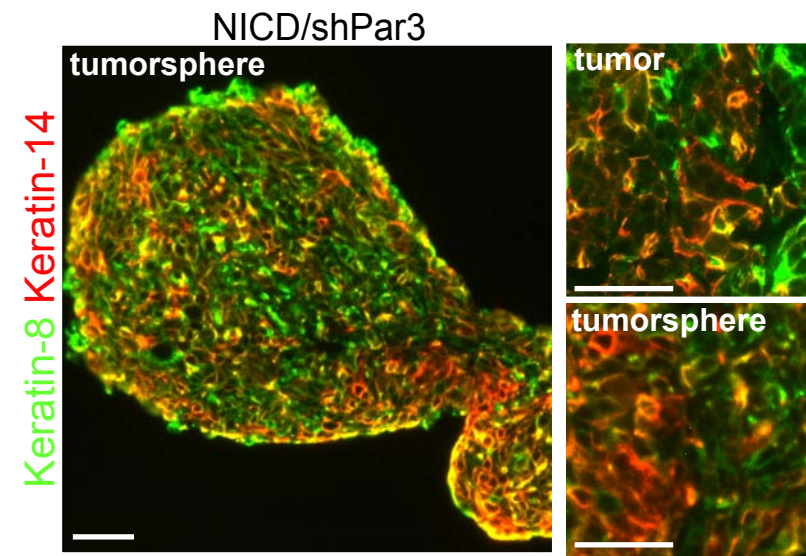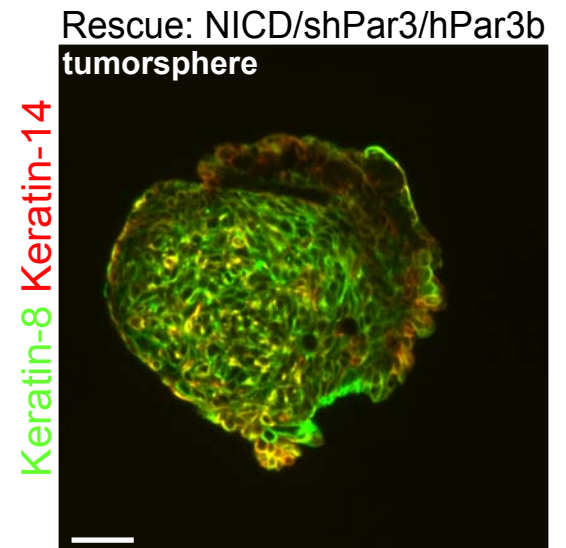

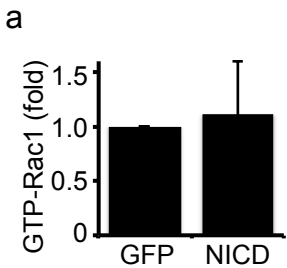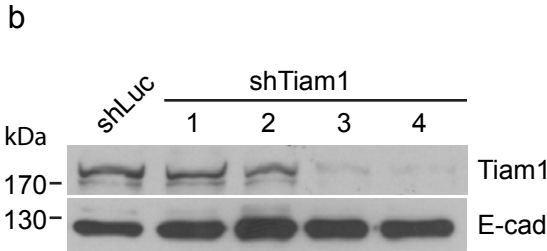



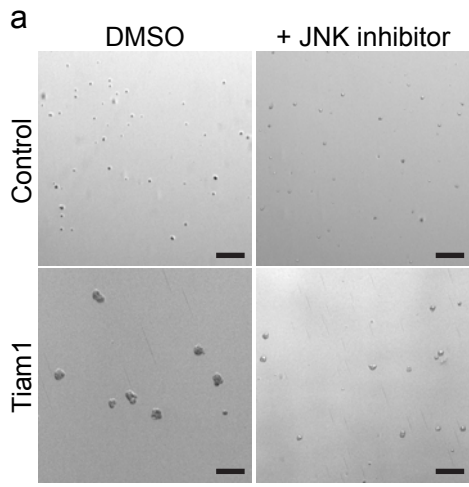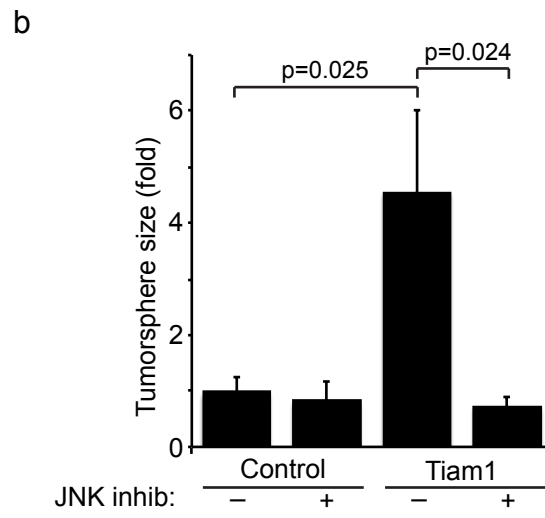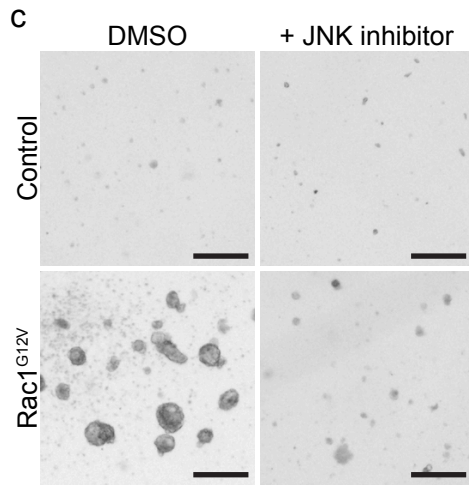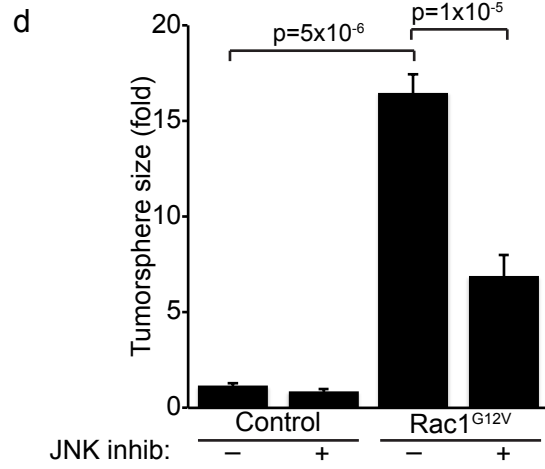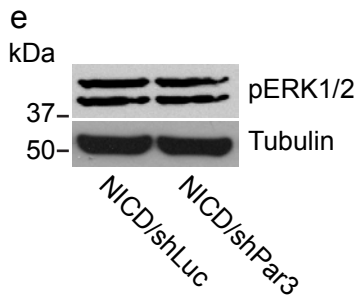

Supplement: NIHMS635504-supplement-1.pdf [file NIHMS635504-supplement-1.pdf]
